# Supplementary material for: De novo assembly and characterization of the transcriptome in the desiccation-tolerant moss Syntrichia caninervis
Source: PubMed Central journal article supplement (PMC4124477; doi:10.1186/1756-0500-7-490), 2014-08-03
Supplement: 1756-0500-7-490-S2.pdf [file 1756-0500-7-490-S2.pdf]

**Table: GO comparison of *P. patens* genome and *S. caninervis* transcriptome**

| Ontology                  | GO-IDs                | Description                      | Number of Gene(Ppa:Sca) | Percentage of Genes(Ppa:Sca) | P-value* |
|---------------------------|-----------------------|----------------------------------|-------------------------|------------------------------|----------|
| <b>Cellular component</b> | GO:0005576            | extracellular region             | 544:193                 | 2.8:0.8                      | 0        |
|                           | GO:0005623            | cell                             | 15236:16039             | 79.0:66.3                    | 0        |
|                           | GO:0031974            | membrane-enclosed lumen          | 840:625                 | 4.4:2.6                      | 0        |
|                           | GO:0031975            | envelope                         | 435:887                 | 2.3:3.7                      | 0        |
|                           | GO:0032991            | macromolecular complex           | 1887:2904               | 9.8:12.0                     | 0        |
|                           | GO:0043226            | organelle                        | 9404:10852              | 48.8:44.9                    | 0        |
|                           | GO:0044422            | organelle part                   | 2228:2988               | 11.6:12.4                    | 0.011    |
|                           | GO:0044464            | cell part                        | 15235:16039             | 79.0:66.3                    | 0        |
| <b>Biological process</b> | GO:0000003            | reproduction                     | 273:787                 | 1.4:3.3                      | 0        |
|                           | GO:0008152            | metabolic process                | 8011:11794              | 41.6:48.8                    | 0        |
|                           | GO:0009987            | cellular process                 | 7971:9617               | 41.3:39.8                    | 0.001    |
|                           | GO:0010926            | anatomical structure formation   | 286:280                 | 1.5:1.2                      | 0.003    |
|                           | GO:0016043            | cellular component organization  | 734:1212                | 3.8:5.0                      | 0        |
|                           | GO:0022414            | reproductive process             | 265:781                 | 1.4:3.2                      | 0        |
|                           | GO:0032501            | multicellular organismal process | 658:1151                | 3.4:4.8                      | 0        |
|                           | GO:0032502            | developmental process            | 600:1598                | 3.1:6.6                      | 0        |
|                           | GO:0043473            | pigmentation                     | 2135:1366               | 11.1:5.6                     | 0        |
|                           | GO:0044085            | cellular component biogenesis    | 446:521                 | 2.3:2.2                      | 0.264    |
|                           | GO:0050896            | response to stimulus             | 1315:2775               | 6.8:11.5                     | 0        |
|                           | GO:0051179            | localization                     | 1663:2583               | 8.6:10.7                     | 0        |
|                           | GO:0051234            | establishment of localization    | 1631:2508               | 8.5:10.4                     | 0        |
|                           | GO:0051704            | multi-organism process           | 200:380                 | 1.0:1.6                      | 0        |
| GO:0065007                | biological regulation | 2335:1808                        | 12.1:7.5                | 0                            |          |
| <b>Molecular function</b> | GO:0003824            | catalytic activity               | 7691:12854              | 39.9:53.2                    | 0        |
|                           | GO:0005198            | structural molecule activity     | 716:1158                | 3.7:4.8                      | 0        |
|                           | GO:0005215            | transporter activity             | 1013:1488               | 5.3:6.2                      | 0        |
|                           | GO:0005488            | binding                          | 9460:12874              | 49.1:53.2                    | 0        |
|                           | GO:0009055            | electron carrier activity        | 487:06:00               | 2.5:0.0                      | 0        |
|                           | GO:0030528            | transcription regulator activity | 1220:171                | 6.3:0.7                      | 0        |
|                           | GO:0045182            | translation regulator activity   | 158:327                 | 0.8:1.4                      | 0        |
|                           | GO:0060089            | molecular transducer activity    | 339:556                 | 1.8:2.3                      | 0        |

\*WEGO employed the pearson Chi-Square test method to calculate the p-value of the two GO annotation dataset.
