# Supplementary material for: De novo assembly and characterization of the transcriptome in the desiccation-tolerant moss Syntrichia caninervis
Source: PubMed Central journal article supplement (PMC4124477; doi:10.1186/1756-0500-7-490), 2014-08-03

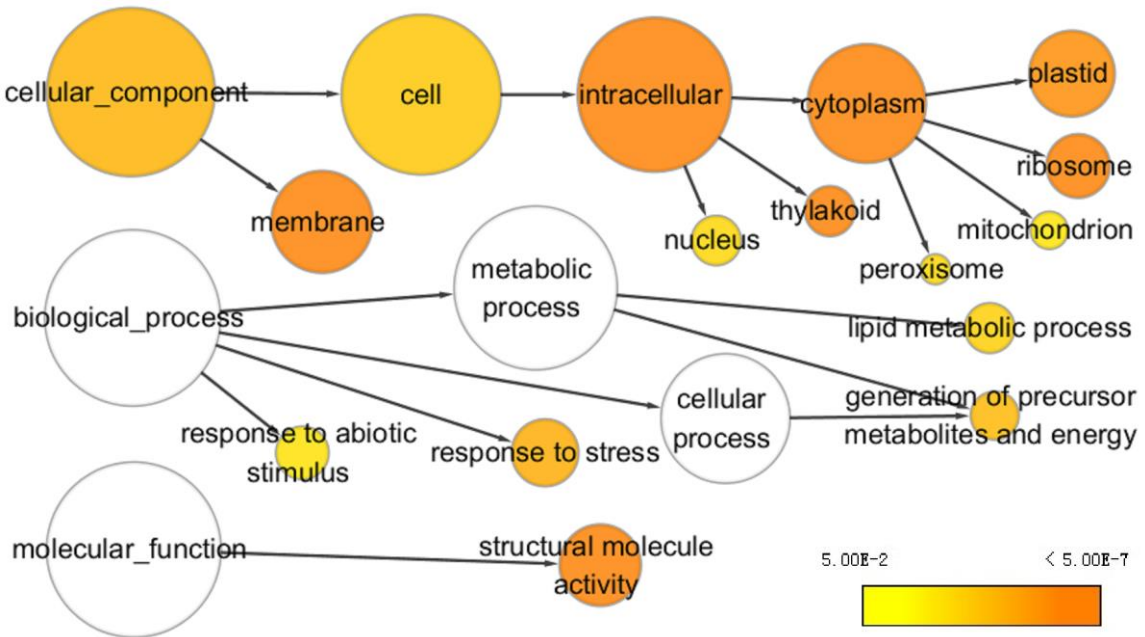

Supplement: 1756-0500-7-490-S3.pdf [file 1756-0500-7-490-S3.pdf]
